# Supplementary material for: A new lung donor score to predict short and long-term survival in lung transplantation
Source: PubMed Central journal article supplement — J Thorac Dis. 2020 Oct;12(10):5485–94. doi: 10.21037/jtd-20-2043 (PMC7656336; doi:10.21037/jtd-20-2043), 2020-10
Supplement: jtd-12-10-5485-dss.pdf [file jtd-12-10-5485-dss.pdf]

## Data Sharing Statement

|                     |                                                                                                                                                    |                                                                                  |
|---------------------|----------------------------------------------------------------------------------------------------------------------------------------------------|----------------------------------------------------------------------------------|
| <b>Article Info</b> | http://dx.doi.org/10.21037/jtd-20-2043.                                                                                                            |                                                                                  |
| <b>Item</b>         | <b>Question</b>                                                                                                                                    | <b>Authors' Response<br/>(place "-" if not applicable)</b>                       |
| 1                   | Would you like to share data collected for your study to others?                                                                                   | No                                                                               |
| 2                   | If not, would you like to share the reason for your decision?                                                                                      | Potential conflict with the Swiss Privacy Act, a federal law                     |
| 3                   | What data in particular will be shared?                                                                                                            | -                                                                                |
| 4                   | Any other documents will be share? Such as study protocol, statistical analysis plan, informed consent form, clinical study report, analytic code. | Supplementary-Tables A, B, C, D and E, available by accessing the online article |
| 5                   | When will data availability begin?                                                                                                                 | -                                                                                |
| 6                   | When will data availability end?                                                                                                                   | -                                                                                |
| 7                   | To whom will you share the data?                                                                                                                   | -                                                                                |
| 8                   | For what type of analysis or purpose?                                                                                                              | -                                                                                |
| 9                   | How or where can the data/documents be obtained?                                                                                                   | -                                                                                |
| 10                  | Any other restrictions?                                                                                                                            | -                                                                                |
